# Supplementary material for: Thermal Transitions and Structural Characteristics of Poly(3,4-ethylenedioxythiophene/cucurbit[7]uril) Polypseudorotaxane and Polyrotaxane Thin Films
Source: MDPI journal article supplement (doi:10.3390/ma17061318), 2024-03-13
Supplement: s1 [file s1]

# Supplementary Material

## Thermal Transitions and Structural Characteristics of Poly(3,4-ethylenedioxythiophene/cucurbit[7]uril) Polypseudorotaxane and Polyrotaxane Thin Films

Barbara Hajduk <sup>1,\*</sup>, Paweł Jarka <sup>2</sup>, Henryk Bednarski <sup>1</sup>, Henryk Janeczek <sup>1</sup>, Pallavi Kumari <sup>1</sup> and Aurica Farcas <sup>3,\*</sup>

<sup>1</sup> Centre of Polymer and Carbon Materials, Polish Academy of Sciences, 34 Marie Curie-Skłodowska str., 41-819 Zabrze, Poland

<sup>2</sup> Department of Engineering Materials and Biomaterials, Silesian University of Technology, 18a Konarskiego str., 41-100 Gliwice, Poland

<sup>3</sup> “Petru Poni” Institute of Macromolecular Chemistry, Romanian Academy, Grigore Ghica Voda Alley, 41A, 700487 Iasi, Romania

\* Correspondence: bhajduk@cmpw-pan.pl (B.H.); afarcas@icmpp.ro (A.F.)

## 1. The technical parameters of spin coating films

The investigated films were prepared by spin-coating and heating at 180 °C for 10 min and then cooled to ambient temperature from filtered DMSO/H<sub>2</sub>O 1/1 v/v solutions of PEDOT·CB7 PS and PEDOT·CB7 PR compounds (10 mg·mL<sup>-1</sup>).

**Table S1.** Summary of spin-coating parameters.

| Material     | Spinning rate<br>[rpm] | Spinning time<br>[s] | Atmosphere | Annealing Temperature<br>[°C] |
|--------------|------------------------|----------------------|------------|-------------------------------|
| PEDOT        | 1000                   | 60                   | air        | 180                           |
| PEDOT·CB7-PS |                        |                      |            |                               |
| PEDOT·CB7-PR |                        |                      |            |                               |

## 2. DSC analysis

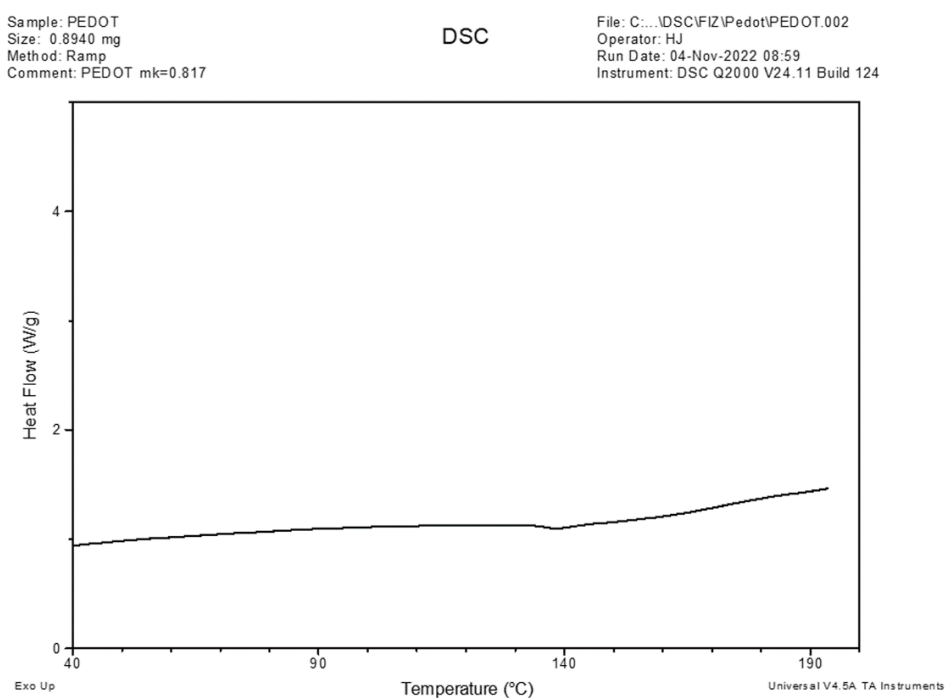

**Figure S1.** DSC plot of PEDOT.

Sample: PEDOT CB7 PS  
Size: 0.8940 mg  
Method: Ramp  
Comment: PEDOT CB7 PS mk=0.771

DSC

File: C:\...\DSC\FIZ\Pedot\PEDOT CB7 PS.003  
Operator: HJ  
Run Date: 04-Nov-2022 09:43  
Instrument: DSC Q2000 V24.11 Build 124

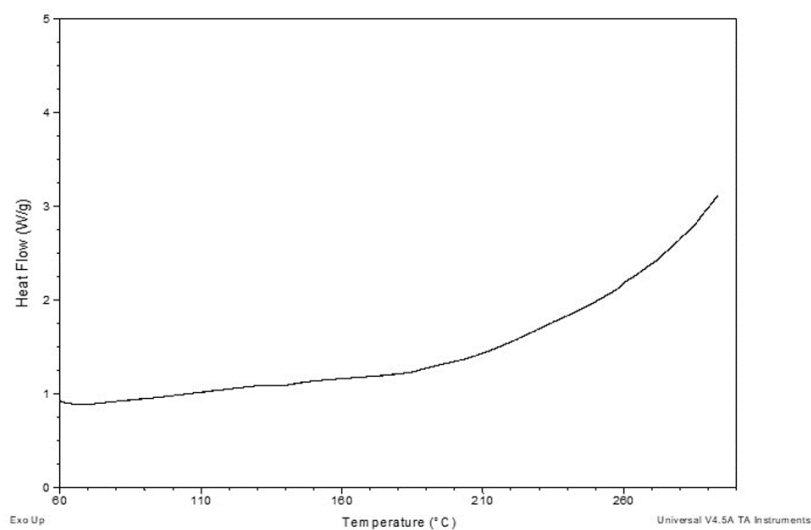

PEDOT CB7 PS. **I-run.** Heating 20°C/min. The DSC curve shows an endothermic peak at  $T_m=78.9^\circ\text{C}$ . The vaporization of low molecular weight compounds and water in the sample.  $M_k=7.490$

**Figure S2.** DSC plot of PEDOT CB7-PS.

PEDOT CB7 PR. **I-run.** Heating 20°C/min.  $>T=150^\circ$  początki rozkładu, parowania,  $>T=250^\circ$  rozkład?,  $m_k=0.621\text{mg}$

Sample: PEDOT CB7PR  
Size: 0.7000 mg  
Method: Ramp  
Comment: PEDOT CB7PR mk0.621

DSC

File: C:\ATA\Data\DSC\FIZ\Pedot\PEDOT CB7PR.001  
Operator: HJ  
Run Date: 07-Nov-2022 08:37  
Instrument: DSC Q2000 V24.11 Build 124

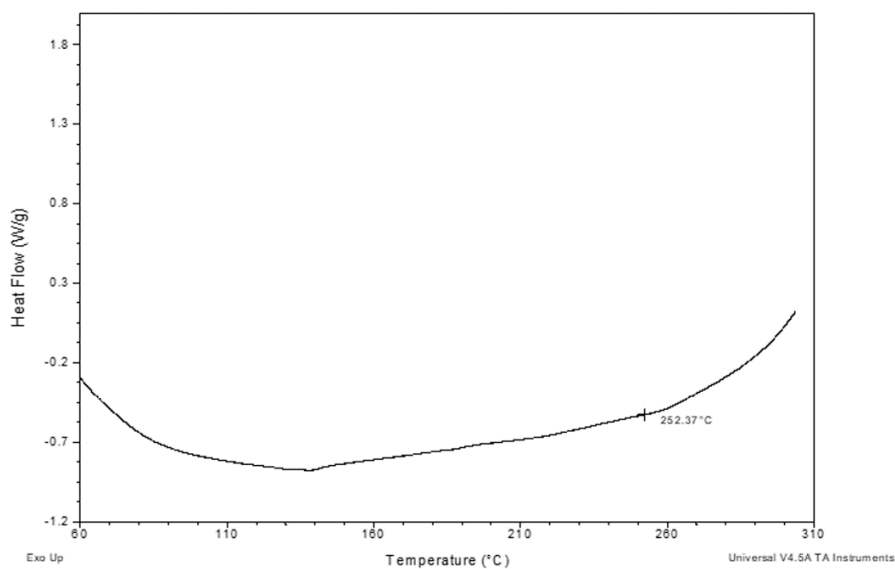

**Figure S3.** DSC plot of PEDOT CB7-PR.

### 3. The values of PEDOT crystallites structural parameters

**Table S2.** The values of PEDOT crystallites structural parameters.

| Powder       | Space group  | Lattice parameters, ICDD, Å        | Crystallite size, Å |
|--------------|--------------|------------------------------------|---------------------|
| PEDOT        | Orthorhombic | a = 13.50<br>b = 6.70<br>c = 10.20 | 22.1                |
| PEDOT·CB7 PS |              | a = 12.97<br>b = 6.80<br>c = 10.70 | 34.8                |
| PEDOT·CB7 PR |              | a = 12.97<br>b = 6.81<br>c = 10.40 | 34.8                |

### 4. The mean square root of the roughness of the investigated samples

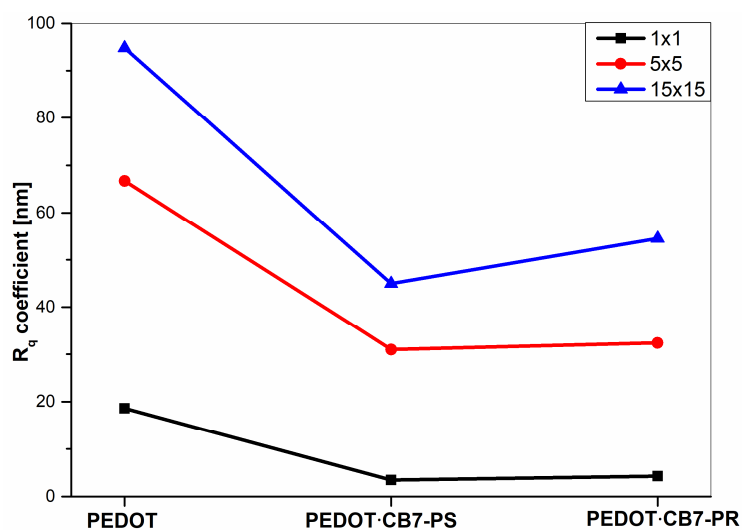

**Figure S4.** The mean square root of the roughness of the investigated samples.

As can be seen, the roughness coefficient has the lowest value in the case of PEDOT·CB7 PS. High  $Rq$  value of the pristine PEDOT could have origin from high crystallites number.
